# Supplementary material for: The Physcomitrella patens unique alpha-dioxygenase participates in both developmental processes and defense responses
Source: PubMed Central journal article supplement (PMC4334559; doi:10.1186/s12870-015-0439-z), 2015-02-12
Supplement: 12870_2015_439_MOESM1_ESM.pdf [file 12870_2015_439_MOESM1_ESM.pdf]

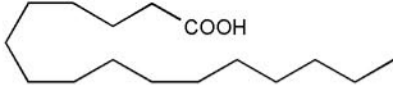

16:0

Pp $\alpha$ -DOX, O<sub>2</sub>

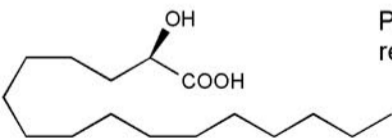

2(*R*)-Hydroxy-16:0

Peroxidase,  
reductase

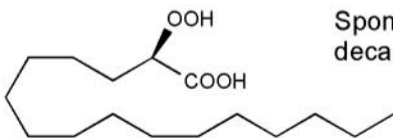

2(*R*)-Hydroperoxy-16:0

Spontaneous  
decarboxylation

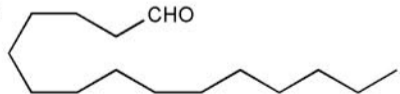

Pentadecanal
