# Supplementary material for: The Physcomitrella patens unique alpha-dioxygenase participates in both developmental processes and defense responses
Source: PubMed Central journal article supplement (PMC4334559; doi:10.1186/s12870-015-0439-z), 2015-02-12

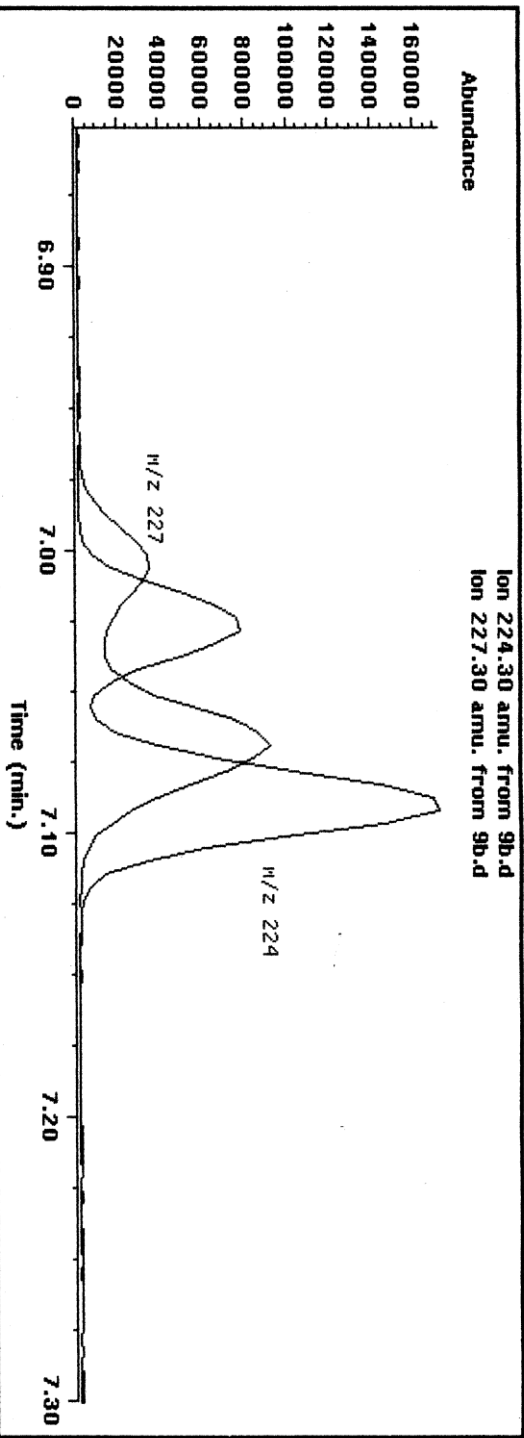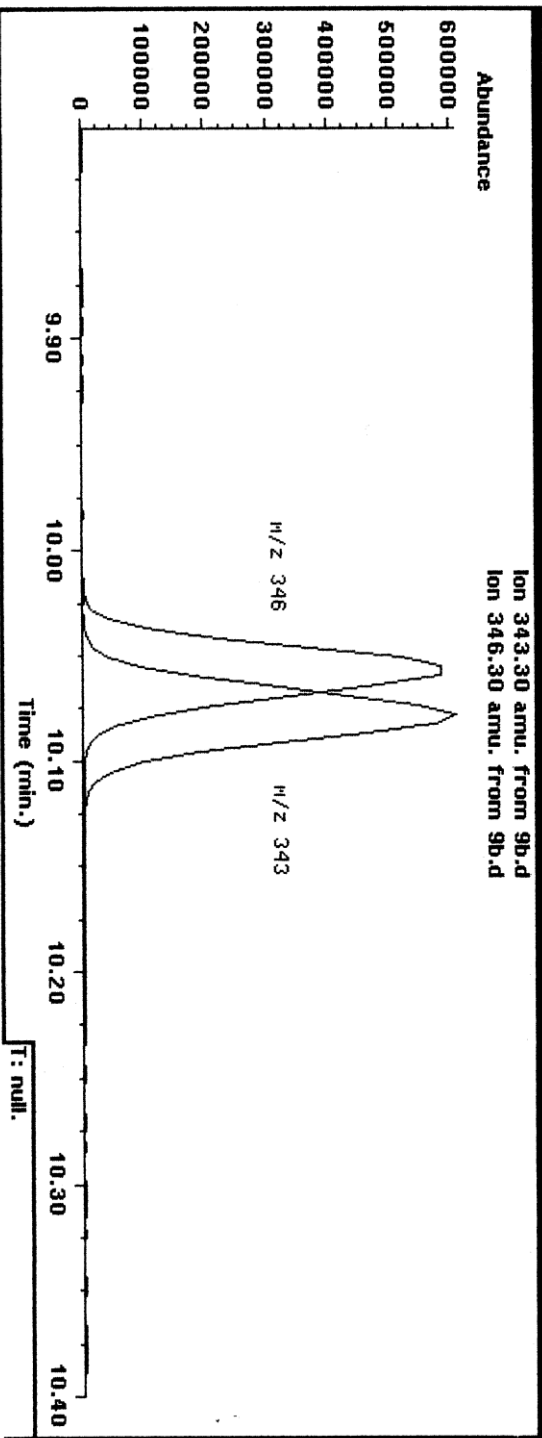

Supplement: 12870_2015_439_MOESM2_ESM.pdf [file 12870_2015_439_MOESM2_ESM.pdf]
